# Supplementary material
Source: PubMed Central journal article supplement (PMC6385586)
Supplement: NIHMS990436-supplement-Appendix_table_1.pdf [file NIHMS990436-supplement-Appendix_table_1.pdf]

**Appendix**  
**Sexual Orientation Disparities in Prescription Opioid Misuse Among U.S. Adults**  
Duncan et al.

**Appendix Table 1.** Individual Correlates of Prescription Opioid Misuse and Prescription Opioid Use Disorder in U.S. Adults

| Characteristics                 | Past-year opioid misuse<br>AOR (95% CI) | Past-month opioid misuse<br>AOR (95% CI) | Past-year opioid use disorder<br>AOR (95% CI) |
|---------------------------------|-----------------------------------------|------------------------------------------|-----------------------------------------------|
| <b>Age, years</b>               |                                         |                                          |                                               |
| 18–25                           | 1.00                                    | 1.00                                     | 1.00                                          |
| 26–34                           | <b>1.32 (1.11, 1.57)**</b>              | <b>1.49 (1.11, 2.00)**</b>               | <b>1.87 (1.25, 2.82)**</b>                    |
| 35–49                           | 1.12 (0.92, 1.38)                       | <b>1.39 (1.03, 1.88)*</b>                | <b>2.09 (1.34, 3.26)**</b>                    |
| ≥50                             | <b>0.65 (0.48, 0.87)**</b>              | 0.69 (0.45, 1.07)                        | 1.02 (0.57, 1.81)                             |
| <b>Sex</b>                      |                                         |                                          |                                               |
| Male                            | 1.00                                    | 1.00                                     | 1.00                                          |
| Female                          | <b>0.84 (0.72, 0.97)*</b>               | 0.86 (0.68, 1.10)                        | <b>0.64 (0.51, 0.81)***</b>                   |
| <b>Race/ethnicity</b>           |                                         |                                          |                                               |
| White                           | 1.00                                    | 1.00                                     | 1.00                                          |
| Black                           | <b>0.69 (0.54, 0.86)**</b>              | 0.73 (0.48, 1.10)                        | 0.76 (0.49, 1.16)                             |
| Hispanic                        | 0.86 (0.70, 1.05)                       | 0.91 (0.63, 1.30)                        | 0.63 (0.36, 1.11)                             |
| Asian/other                     | 0.76 (0.55, 1.04)                       | 0.88 (0.49, 1.57)                        | 0.82 (0.51, 1.31)                             |
| <b>Education</b>                |                                         |                                          |                                               |
| Less than high school           | 1.00                                    | 1.00                                     | 1.00                                          |
| High school diploma             | <b>0.78 (0.66, 0.92)**</b>              | 0.83 (0.58, 1.18)                        | 0.91 (0.60, 1.38)                             |
| Some college                    | 0.82 (0.66, 1.01)                       | 0.70 (0.50, 0.97)                        | 0.73 (0.48, 1.11)                             |
| College degree or higher        | <b>0.58 (0.45, 0.75)***</b>             | <b>0.47 (0.31, 0.71)**</b>               | <b>0.50 (0.27, 0.94)*</b>                     |
| <b>Relationship status</b>      |                                         |                                          |                                               |
| Married                         | 1.00                                    | 1.00                                     | 1.00                                          |
| Widowed                         | 1.11 (0.76, 1.63)                       | 1.05 (0.53, 2.06)                        | 1.40 (0.71, 2.77)                             |
| Divorced                        | <b>1.40 (1.11, 1.76)**</b>              | <b>1.42 (1.00, 2.00)*</b>                | 1.55 (0.95, 2.56)                             |
| Never married                   | <b>1.25 (1.05, 1.49)*</b>               | 0.89 (0.63, 1.25)                        | 1.31 (0.76, 2.25)                             |
| <b>Annual family income</b>     |                                         |                                          |                                               |
| <\$20,000                       | 1.00                                    | 1.00                                     | 1.00                                          |
| \$20,000–\$49,999               | 1.06 (0.88, 1.28)                       | 0.90 (0.68, 1.21)                        | 0.98 (0.65, 1.48)                             |
| \$50,000–\$74,999               | 0.98 (0.79, 1.21)                       | 1.07 (0.75, 1.53)                        | 1.18 (0.67, 2.09)                             |
| ≥\$75,000                       | 0.99 (0.79, 1.24)                       | 0.83 (0.59, 1.15)                        | 0.66 (0.38, 1.14)                             |
| <b>Population density</b>       |                                         |                                          |                                               |
| Large MSA                       | 1.00                                    | 1.00                                     | 1.00                                          |
| Small MSA                       | 0.97 (0.83, 1.13)                       | 1.07 (0.84, 1.37)                        | 1.06 (0.74, 1.53)                             |
| Non-MSA                         | 0.92 (0.78, 1.09)                       | 1.15 (0.89, 1.49)                        | 1.07 (0.70, 1.64)                             |
| Government assistance recipient | <b>0.72 (0.61, 0.85)***</b>             | <b>0.76 (0.59, 0.97)*</b>                | <b>0.56 (0.37, 0.83)**</b>                    |
| <b>Past-year drug use</b>       |                                         |                                          |                                               |
| Marijuana                       | <b>3.02 (2.51, 3.62)***</b>             | <b>3.32 (2.28, 4.82)***</b>              | <b>1.93 (1.22, 3.04)**</b>                    |
| Cocaine                         | <b>2.63 (1.93, 3.58)***</b>             | <b>2.61 (1.72, 3.97)***</b>              | <b>2.21 (1.26, 3.89)**</b>                    |
| Methamphetamine                 | <b>2.88 (1.89, 4.39)***</b>             | <b>1.82 (1.06, 3.14)*</b>                | <b>2.01 (1.03, 3.95)*</b>                     |
| Tranquilizers (misuse)          | <b>11.36 (9.09, 14.18)***</b>           | <b>9.46 (6.72, 13.30)***</b>             | <b>17.26 (11.54, 25.82)***</b>                |

Notes: Boldface indicates statistical significance (\* $p < 0.05$ ; \*\* $p < 0.01$ ; \*\*\* $p < 0.001$ ). White and black participants were identified as non-Hispanic.

MSA, metropolitan statistical area.
